# Supplementary material for: A rare three-coordinated zinc cluster–organic framework with two types of secondary building units
Source: Royal Society of Chemistry journal article supplement (doi:10.1039/c4cc09782c), 2015-01-01
Supplement: c4cc09782c1.pdf [file c4cc09782c1.pdf]

## Supporting Information

### **A rare three-coordinated zinc cluster-organic framework with two types of second building units**

Jin-Song Hu,<sup>a, b</sup> Lei Zhang,<sup>b</sup> Ling Qin,<sup>a</sup> He-Gen Zheng,<sup>\*,a</sup> Xiang-Biao Zhang<sup>\*,b</sup>

*<sup>a</sup>State Key Laboratory of Coordination Chemistry, School of Chemistry and Chemical Engineering, Collaborative Innovation Center of Advanced Microstructures, Nanjing University, Nanjing 210093, P. R. China.*

*<sup>b</sup>School of Chemical Engineering, Anhui University of Science and Technology, Huainan 232001*

1. Materials and methods
2. Synthesis procedure
3. Electronic structure calculations
4. CD, PXRD, TGA and luminescent and the photoluminescence lifetime patterns
5. Bond Lengths (Å) and Angles (deg) of **1**

## ***1. Materials and methods***

Reagents and solvents employed were commercially available and used as received. Ligand H<sub>3</sub>NTB was prepared by the literature methods [S1]. IR absorption spectra of the complexes were recorded in the range of 400–4000 cm<sup>-1</sup> on a Nicolet (Impact 410) spectrometer with KBr pellets (5 mg of sample in 500 mg of KBr). Powder X-ray diffraction (PXRD) measurements were performed on a Bruker D8 Advance X-ray diffractometer using Cu-K $\alpha$  radiation (0.15418 nm), in which the X-ray tube was operated at 40 kV and 40 mA. Luminescent spectra were recorded with a SHIMAZU VF-320 X-ray fluorescence spectrophotometer at room temperature. The photoluminescence lifetime was measured with an Edinburgh Instruments FLS920P fluorescence spectrometer. The as-synthesized samples were characterized by thermogravimetric analysis (TGA) on a Perkin Elmer thermogravimetric analyzer Pyris 1 TGA up to 1023 K using a heating rate of 10 K min<sup>-1</sup> under N<sub>2</sub> atmosphere. A pulsed Q-switched Nd:YAG laser at a wavelength of 1064 nm was used to generate a SHG signal. The backscattered SHG light was collected by a spherical concave mirror and passed through a filter that transmits only 532 nm radiation.

The solvent molecules in the structure were found to be highly disordered and were impossible to refine using conventional discrete-atom models. To resolve these issues, the contribution of the electron density by the remaining solvent molecules was removed by the SQUEEZE routine in PLATON [S2]. The numbers of solvent molecules were obtained by element analysis, IR and TGA.

## ***References***

- [S1] J. Wang, C. He, P. Y. Wu, J. Wang, C. Y. Duan, *J. Am. Chem. Soc.*, 2011, **133**, 12402.
- [S2] A. L. Spek, *Acta Crystallogr., Sect. A: Found Crystallogr.* 1990, **46**, 194.

## 2. Synthesis procedure

A mixture of  $\text{Zn}(\text{NO}_3)_2 \cdot 6\text{H}_2\text{O}$  (0.4 mmol),  $\text{H}_3\text{NTB}$  (0.1 mmol) and  $\text{H}_2\text{NDB}$  (0.1 mmol) is dispersed in 10 mL  $\text{H}_2\text{O}$ , and the mixture is adjusted to pH=6. The final mixture is placed in a Parr Teflon-lined stainless steel vessel (15 mL) and heated at 150 °C for 4d. Large quantities of faint yellow-block crystals is obtained, the crystals are filtered off, washed with mother liquid, and dried under ambient conditions. yield of the reaction is ~40%. Anal. Calcd for  $\text{C}_{168}\text{H}_{178}\text{N}_9\text{O}_{94}\text{Zn}_{17}$ : C, 40.86%, H, 3.63%, N, 2.55%; found C, 40.61%, H, 3.86%, N, 2.35%. IR (KBr,  $\text{cm}^{-1}$ ): 3485(w), 3062(w), 2361(m), 1666(s), 1604(s), 1548(s), 1383(s), 1299(w), 1161(m), 1093(m), 1010(w), 844(w), 794(m), 733(s), 615(m).

## 3. Electronic structure calculations

### Computational details

Starting from the crystal structures, geometry optimizations were performed for clusters  $\text{Zn}_4\text{H}_6(\mu_4\text{-O})(\text{COO})_6$  and  $\text{Zn}_9\text{H}_{12}(\mu_3\text{-O})_3(\text{COO})_{12}$  using the DFT/B3LYP/ 6-31G(d) with diffuse functions for oxygen atoms. In order to obtain the same geometry configurations with clusters in the MOFs,  $\text{Zn}_4\text{H}_6(\mu_4\text{-O})(\text{COO})_6$  and  $\text{Zn}_9\text{H}_{12}(\mu_3\text{-O})_3(\text{COO})_{12}$  are constrained to have  $C_3$  and  $D_3$  symmetries, respectively. To further study the configuration of  $\text{Zn}_9\text{H}_{12}(\mu_3\text{-O})_3(\text{COO})_{12}$ , we calculated its structure again without any symmetry constraint. As a result, a stable configuration  $\text{Zn}_9\text{H}_{12}(\mu_3\text{-O})(\mu_4\text{-O})_2(\text{COO})_{12}$  was obtained. Based on the optimized geometry structures, frequency calculations were carried out at the same theoretical level and accurate electronic energies for these clusters were calculated using the DFT/B3LYP/6-311++G(d,p). Finally, we performed natural bond orbital (NBO) analysis[S3] for all the clusters. All the calculations were carried out with the Gaussian03 package[S4]. Our calculation methods have been successfully used to the similar study of the Zn clusters.[S5] The calculated results indicate that  $\text{Zn}_4\text{H}_6(\mu_4\text{-O})(\text{COO})_6$  and  $\text{Zn}_9\text{H}_{12}(\mu_3\text{-O})(\mu_4\text{-O})_2(\text{COO})_{12}$  have no imaginary frequency and  $\text{Zn}_9\text{H}_{12}(\mu_3\text{-O})_3(\text{COO})_{12}$  has five imaginary frequencies (-59.1i, -59.1i, -30.0i, -30.0i, -16.6i).

*Cartesian coordinates and electronic energies (E) by the B3LYP/ 6-311++G(d,p)*

Zn<sub>4</sub>H<sub>6</sub>(μ<sub>4</sub>-O)(COO)<sub>6</sub> (E = -8328.43262 au)

| Center Number | Atomic Number | Coordinates (Angstroms) |           |           |
|---------------|---------------|-------------------------|-----------|-----------|
|               |               | X                       | Y         | Z         |
| 1             | 8             | 0.120544                | -0.155879 | 0.058033  |
| 2             | 8             | -0.010014               | -0.155879 | 4.750175  |
| 3             | 8             | 4.118779                | -0.155879 | 2.517170  |
| 4             | 8             | 2.375327                | -0.106159 | -0.129036 |
| 5             | 8             | -1.299412               | -0.106159 | 2.891010  |
| 6             | 8             | 3.153394                | -0.106159 | 4.563404  |
| 7             | 8             | -1.390279               | 2.459613  | 1.030208  |
| 8             | 8             | 1.587326                | 2.459613  | 5.572498  |
| 9             | 8             | 4.032262                | 2.459613  | 0.722672  |
| 10            | 8             | -0.240786               | 4.308682  | 1.648424  |
| 11            | 8             | 1.547970                | 4.308682  | 4.267900  |
| 12            | 8             | 2.922125                | 4.308682  | 1.409053  |
| 13            | 8             | 1.409770                | 1.629354  | 2.441793  |
| 14            | 30            | -0.267237               | 0.966355  | 1.616922  |
| 15            | 30            | 1.533914                | 0.966355  | 4.306558  |
| 16            | 30            | 2.962631                | 0.966355  | 1.401898  |
| 17            | 30            | 1.409770                | 3.612173  | 2.441793  |
| 18            | 6             | 1.596244                | 3.706913  | 5.376700  |
| 19            | 1             | 1.652304                | 4.340498  | 6.273167  |
| 20            | 6             | 3.858237                | 3.706912  | 0.812847  |
| 21            | 1             | 4.606570                | 4.340498  | 0.316065  |
| 22            | 6             | -1.225172               | 3.706913  | 1.135830  |
| 23            | 1             | -2.029565               | 4.340498  | 0.736146  |
| 24            | 6             | 1.217217                | -0.454332 | -0.491435 |
| 25            | 1             | 1.156951                | -1.089231 | -1.386717 |
| 26            | 6             | 4.046296                | -0.454332 | 3.741651  |
| 27            | 1             | 4.851766                | -1.089231 | 4.137100  |
| 28            | 6             | -1.034204               | -0.454332 | 4.075162  |
| 29            | 1             | -1.779408               | -1.089231 | 4.574995  |

Zn<sub>9</sub>H<sub>12</sub>(μ<sub>3</sub>-O)<sub>3</sub>(COO)<sub>12</sub> (E = -18511.4158202 au)

| Center Number | Atomic Number | Coordinates (Angstroms) |           |           |
|---------------|---------------|-------------------------|-----------|-----------|
|               |               | X                       | Y         | Z         |
| 1             | 8             | 0.000000                | 1.845597  | 0.000000  |
| 2             | 8             | -1.755508               | 0.597141  | 3.352372  |
| 3             | 8             | -2.428078               | 2.430027  | 2.195468  |
| 4             | 30            | 0.000000                | 0.000000  | 3.014847  |
| 5             | 30            | 0.000000                | 0.000000  | 0.000000  |
| 6             | 30            | -1.067422               | 3.099623  | 0.958902  |
| 7             | 30            | 1.067422                | 3.099623  | -0.958902 |
| 8             | 8             | 0.360615                | -1.818885 | 3.352372  |
| 9             | 8             | 1.394894                | 1.221744  | 3.352372  |
| 10            | 8             | -1.598334               | -0.922799 | 0.000000  |
| 11            | 8             | 1.598334                | -0.922799 | 0.000000  |
| 12            | 8             | 0.215809                | 4.297395  | 1.918932  |
| 13            | 8             | -1.894635               | 4.308962  | -0.390260 |
| 14            | 8             | 2.428078                | 2.430027  | -2.195468 |
| 15            | 8             | -0.215809               | 4.297395  | -1.918932 |
| 16            | 8             | 1.894635                | 4.308962  | 0.390260  |
| 17            | 30            | -3.218063               | -0.625397 | -0.958902 |
| 18            | 30            | -2.150641               | -2.474226 | 0.958902  |
| 19            | 30            | 2.150641                | -2.474226 | -0.958902 |
| 20            | 30            | 3.218063                | -0.625397 | 0.958902  |
| 21            | 8             | -0.890426               | -3.317791 | 2.195468  |
| 22            | 8             | 3.318504                | 0.887764  | 2.195468  |
| 23            | 8             | -3.318504               | 0.887764  | -2.195468 |
| 24            | 8             | -3.613749               | -2.335594 | -1.918932 |
| 25            | 8             | -4.678988               | -0.513680 | 0.390260  |
| 26            | 8             | -3.829558               | -1.961801 | 1.918932  |
| 27            | 8             | -2.784354               | -3.795283 | -0.390260 |
| 28            | 8             | 0.890426                | -3.317791 | -2.195468 |
| 29            | 8             | 3.829558                | -1.961801 | -1.918932 |
| 30            | 8             | 2.784354                | -3.795283 | 0.390260  |
| 31            | 8             | 3.613749                | -2.335594 | 1.918932  |
| 32            | 8             | 4.678988                | -0.513680 | -0.390260 |
| 33            | 8             | 1.755508                | 0.597141  | -3.352372 |
| 34            | 30            | 0.000000                | 0.000000  | -3.014847 |
| 35            | 8             | -0.360615               | -1.818885 | -3.352372 |
| 36            | 8             | -1.394894               | 1.221744  | -3.352372 |
| 37            | 6             | 4.705678                | -1.166716 | -1.472980 |
| 38            | 1             | 5.595761                | -1.021057 | -2.104309 |
| 39            | 6             | 3.363245                | -3.491879 | 1.472980  |
| 40            | 1             | 3.682142                | -4.335543 | 2.104309  |
| 41            | 6             | 0.023131                | -2.988993 | -3.031493 |

|    |   |           |           |           |
|----|---|-----------|-----------|-----------|
| 42 | 1 | -0.485716 | -3.801782 | -3.567807 |
| 43 | 6 | 2.576979  | 1.514529  | -3.031493 |
| 44 | 1 | 3.535298  | 1.480248  | -3.567807 |
| 45 | 6 | -2.600110 | 1.474464  | -3.031493 |
| 46 | 1 | -3.049582 | 2.321533  | -3.567807 |
| 47 | 6 | -3.363245 | -3.491879 | -1.472980 |
| 48 | 1 | -3.682142 | -4.335543 | -2.104309 |
| 49 | 6 | -4.705678 | -1.166716 | 1.472980  |
| 50 | 1 | -5.595761 | -1.021057 | 2.104309  |
| 51 | 6 | -2.576979 | 1.514529  | 3.031493  |
| 52 | 1 | -3.535298 | 1.480248  | 3.567807  |
| 53 | 6 | -0.023131 | -2.988993 | 3.031493  |
| 54 | 1 | 0.485716  | -3.801782 | 3.567807  |
| 55 | 6 | 2.600110  | 1.474464  | 3.031493  |
| 56 | 1 | 3.049582  | 2.321533  | 3.567807  |
| 57 | 6 | 1.342433  | 4.658595  | 1.472980  |
| 58 | 1 | 1.913619  | 5.356600  | 2.104309  |
| 59 | 6 | -1.342433 | 4.658595  | -1.472980 |
| 60 | 1 | -1.913619 | 5.356600  | -2.104309 |

Zn<sub>9</sub>H<sub>12</sub>(μ<sub>3</sub>-O)(μ<sub>4</sub>-O)<sub>2</sub>(COO)<sub>12</sub> (E = -18511.5053905 au)

| Center Number | Atomic Number | Coordinates (Angstroms) |           |           |
|---------------|---------------|-------------------------|-----------|-----------|
|               |               | X                       | Y         | Z         |
| 1             | 8             | -0.036607               | 1.629895  | 0.008158  |
| 2             | 8             | 1.732262                | 3.137696  | -2.228361 |
| 3             | 8             | 2.747912                | 3.189557  | -0.200972 |
| 4             | 30            | 0.059473                | 2.183875  | -1.853584 |
| 5             | 30            | 0.323373                | -0.314532 | -0.161126 |
| 6             | 30            | 1.194095                | 2.867263  | 0.930858  |
| 7             | 30            | -1.653741               | 2.177620  | 0.980246  |
| 8             | 8             | 0.559327                | 0.313969  | -2.428700 |
| 9             | 8             | -1.587159               | 2.852506  | -2.676913 |
| 10            | 8             | 1.932016                | -1.179981 | -0.079715 |
| 11            | 8             | -1.428464               | -1.206665 | -0.044426 |
| 12            | 8             | 0.213967                | 4.636455  | 0.792153  |
| 13            | 8             | 1.226129                | 2.431427  | 2.822535  |
| 14            | 8             | -3.067338               | 0.813996  | 1.337191  |
| 15            | 8             | -1.011644               | 2.089301  | 2.926764  |
| 16            | 8             | -1.986989               | 4.105348  | 0.747040  |
| 17            | 30            | 3.090715                | -1.373630 | 1.406319  |
| 18            | 30            | 3.218920                | -1.090502 | -1.466107 |
| 19            | 30            | -1.784282               | -2.885918 | -1.022239 |
| 20            | 30            | -2.962474               | -0.198372 | -0.766816 |

---

|    |    |           |           |           |
|----|----|-----------|-----------|-----------|
| 21 | 8  | 2.399346  | -0.706348 | -3.239340 |
| 22 | 8  | -2.776026 | 1.762922  | -1.117377 |
| 23 | 8  | 2.239538  | -1.599608 | 3.174344  |
| 24 | 8  | 4.205114  | -2.971710 | 0.933413  |
| 25 | 8  | 4.360953  | 0.171575  | 1.293062  |
| 26 | 8  | 4.475838  | 0.395741  | -0.966756 |
| 27 | 8  | 4.289055  | -2.752111 | -1.328645 |
| 28 | 8  | -0.999975 | -4.390380 | -0.067977 |
| 29 | 8  | -3.760459 | -3.191342 | -0.718958 |
| 30 | 8  | -1.588704 | -2.522708 | -2.925229 |
| 31 | 8  | -2.713772 | -0.560894 | -2.787822 |
| 32 | 8  | -4.660496 | -1.134798 | -0.423300 |
| 33 | 8  | -3.071030 | -0.883862 | 2.802941  |
| 34 | 30 | -1.557469 | -1.706357 | 1.836160  |
| 35 | 8  | -1.339389 | -3.652407 | 2.049547  |
| 36 | 8  | 0.186872  | -1.013570 | 2.472175  |
| 37 | 6  | -4.718174 | -2.399211 | -0.506954 |
| 38 | 1  | -5.712954 | -2.848450 | -0.373130 |
| 39 | 6  | -2.122167 | -1.479246 | -3.413918 |
| 40 | 1  | -2.053666 | -1.375288 | -4.507071 |
| 41 | 6  | -1.012013 | -4.521063 | 1.188239  |
| 42 | 1  | -0.700573 | -5.499643 | 1.578778  |
| 43 | 6  | -3.448547 | 0.250461  | 2.417552  |
| 44 | 1  | -4.173096 | 0.783475  | 3.047047  |
| 45 | 6  | 0.999781  | -1.493050 | 3.327660  |
| 46 | 1  | 0.590915  | -1.834137 | 4.291768  |
| 47 | 6  | 4.537423  | -3.333002 | -0.230867 |
| 48 | 1  | 5.117079  | -4.265951 | -0.302644 |
| 49 | 6  | 4.773330  | 0.707592  | 0.224991  |
| 50 | 1  | 5.473906  | 1.547407  | 0.345003  |
| 51 | 6  | 2.717070  | 3.334732  | -1.455363 |
| 52 | 1  | 3.648209  | 3.667958  | -1.931770 |
| 53 | 6  | 1.336702  | -0.064457 | -3.374425 |
| 54 | 1  | 1.037104  | 0.196548  | -4.401209 |
| 55 | 6  | -2.673106 | 2.434508  | -2.192428 |
| 56 | 1  | -3.592674 | 2.692023  | -2.734043 |
| 57 | 6  | -1.013912 | 4.919374  | 0.743807  |
| 58 | 1  | -1.275390 | 5.985950  | 0.684862  |
| 59 | 6  | 0.142862  | 2.164349  | 3.426813  |
| 60 | 1  | 0.231385  | 1.982345  | 4.507652  |

*Summary of natural population analyses*

| Atom                      | Center Number | Natural Charge | Natural Population |          |         |          |
|---------------------------|---------------|----------------|--------------------|----------|---------|----------|
|                           |               |                | Cor                | Val      | Ryd     | Total    |
| $Zn_4H_6(\mu_4-O)(COO)_6$ |               |                |                    |          |         |          |
| O                         | 1             | -0.86142       | 1.99973            | 6.83757  | 0.02412 | 8.86142  |
| O                         | 2             | -0.86143       | 1.99973            | 6.83758  | 0.02412 | 8.86143  |
| O                         | 3             | -0.86137       | 1.99973            | 6.83753  | 0.02412 | 8.86137  |
| O                         | 4             | -0.86105       | 1.99973            | 6.83721  | 0.02410 | 8.86105  |
| O                         | 5             | -0.86103       | 1.99973            | 6.83720  | 0.02410 | 8.86103  |
| O                         | 6             | -0.86101       | 1.99973            | 6.83718  | 0.02410 | 8.86101  |
| O                         | 7             | -0.86159       | 1.99973            | 6.83774  | 0.02412 | 8.86159  |
| O                         | 8             | -0.86162       | 1.99973            | 6.83777  | 0.02412 | 8.86162  |
| O                         | 9             | -0.86160       | 1.99973            | 6.83775  | 0.02412 | 8.86160  |
| O                         | 10            | -0.86114       | 1.99973            | 6.83730  | 0.02411 | 8.86114  |
| O                         | 11            | -0.86115       | 1.99973            | 6.83731  | 0.02411 | 8.86115  |
| O                         | 12            | -0.86113       | 1.99973            | 6.83730  | 0.02411 | 8.86113  |
| O                         | 13            | -1.85458       | 1.99999            | 7.77981  | 0.07477 | 9.85458  |
| Zn                        | 14            | 1.74499        | 17.99825           | 10.20505 | 0.05170 | 28.25501 |
| Zn                        | 15            | 1.74497        | 17.99825           | 10.20506 | 0.05172 | 28.25503 |
| Zn                        | 16            | 1.74503        | 17.99825           | 10.20504 | 0.05168 | 28.25497 |
| Zn                        | 17            | 1.74507        | 17.99825           | 10.20499 | 0.05168 | 28.25493 |

#### Natural Electron Configuration

|    |    |                                                     |
|----|----|-----------------------------------------------------|
| O  | 1  | [core]2S( 1.72)2p( 5.12)3p( 0.01)3d( 0.01)          |
| O  | 2  | [core]2S( 1.72)2p( 5.12)3p( 0.01)3d( 0.01)4p( 0.01) |
| O  | 3  | [core]2S( 1.72)2p( 5.12)3p( 0.01)3d( 0.01)          |
| O  | 4  | [core]2S( 1.72)2p( 5.12)3p( 0.01)3d( 0.01)          |
| O  | 5  | [core]2S( 1.72)2p( 5.12)3p( 0.01)3d( 0.01)4p( 0.01) |
| O  | 6  | [core]2S( 1.72)2p( 5.12)3p( 0.01)3d( 0.01)          |
| O  | 7  | [core]2S( 1.72)2p( 5.12)3p( 0.01)3d( 0.01)4p( 0.01) |
| O  | 8  | [core]2S( 1.72)2p( 5.12)3p( 0.01)3d( 0.01)4p( 0.01) |
| O  | 9  | [core]2S( 1.72)2p( 5.12)3p( 0.01)3d( 0.01)4p( 0.01) |
| O  | 10 | [core]2S( 1.72)2p( 5.12)3p( 0.01)3d( 0.01)          |
| O  | 11 | [core]2S( 1.72)2p( 5.12)3p( 0.01)3d( 0.01)4p( 0.01) |
| O  | 12 | [core]2S( 1.72)2p( 5.12)3p( 0.01)3d( 0.01)          |
| O  | 13 | [core]2S( 1.94)2p( 5.84)3p( 0.06)4p( 0.01)          |
| Zn | 14 | [core]4S( 0.27)3d( 9.93)4p( 0.01)5p( 0.04)          |
| Zn | 15 | [core]4S( 0.27)3d( 9.93)4p( 0.01)5p( 0.04)          |
| Zn | 16 | [core]4S( 0.27)3d( 9.93)5p( 0.05)                   |
| Zn | 17 | [core]4S( 0.27)3d( 9.93)4p( 0.01)5p( 0.04)          |

#### $Zn_9H_{12}(\mu_3-O)_3(COO)_{12}$



|    |    |          |          |          |         |          |
|----|----|----------|----------|----------|---------|----------|
| O  | 1  | -1.79416 | 1.99998  | 7.75328  | 0.04090 | 9.79416  |
| O  | 2  | -0.91346 | 1.99971  | 6.88560  | 0.02815 | 8.91346  |
| O  | 3  | -0.83152 | 1.99970  | 6.80512  | 0.02670 | 8.83152  |
| Zn | 4  | 1.70598  | 17.99763 | 10.23702 | 0.05937 | 28.29402 |
| Zn | 5  | 1.74650  | 17.99874 | 10.19775 | 0.05701 | 28.25350 |
| Zn | 6  | 1.74887  | 17.99829 | 10.19684 | 0.05600 | 28.25113 |
| Zn | 7  | 1.74887  | 17.99829 | 10.19684 | 0.05600 | 28.25113 |
| O  | 8  | -0.91346 | 1.99971  | 6.88560  | 0.02815 | 8.91346  |
| O  | 9  | -0.91346 | 1.99971  | 6.88560  | 0.02815 | 8.91346  |
| O  | 10 | -1.79416 | 1.99998  | 7.75328  | 0.04090 | 9.79416  |
| O  | 11 | -1.79416 | 1.99998  | 7.75328  | 0.04090 | 9.79416  |
| O  | 12 | -0.85307 | 1.99973  | 6.82958  | 0.02375 | 8.85307  |
| O  | 13 | -0.85295 | 1.99973  | 6.83020  | 0.02301 | 8.85295  |
| O  | 14 | -0.83152 | 1.99970  | 6.80512  | 0.02670 | 8.83152  |
| O  | 15 | -0.85307 | 1.99973  | 6.82958  | 0.02375 | 8.85307  |
| O  | 16 | -0.85295 | 1.99973  | 6.83020  | 0.02301 | 8.85295  |
| Zn | 17 | 1.74887  | 17.99829 | 10.19684 | 0.05600 | 28.25113 |
| Zn | 18 | 1.74887  | 17.99829 | 10.19684 | 0.05600 | 28.25113 |
| Zn | 19 | 1.74887  | 17.99829 | 10.19684 | 0.05600 | 28.25113 |
| Zn | 20 | 1.74887  | 17.99829 | 10.19684 | 0.05600 | 28.25113 |
| O  | 21 | -0.83152 | 1.99970  | 6.80512  | 0.02670 | 8.83152  |
| O  | 22 | -0.83152 | 1.99970  | 6.80512  | 0.02670 | 8.83152  |
| O  | 23 | -0.83152 | 1.99970  | 6.80512  | 0.02670 | 8.83152  |
| O  | 24 | -0.85307 | 1.99973  | 6.82958  | 0.02375 | 8.85307  |
| O  | 25 | -0.85295 | 1.99973  | 6.83020  | 0.02301 | 8.85295  |
| O  | 26 | -0.85307 | 1.99973  | 6.82958  | 0.02375 | 8.85307  |
| O  | 27 | -0.85295 | 1.99973  | 6.83020  | 0.02301 | 8.85295  |
| O  | 28 | -0.83152 | 1.99970  | 6.80512  | 0.02670 | 8.83152  |
| O  | 29 | -0.85307 | 1.99973  | 6.82958  | 0.02375 | 8.85307  |
| O  | 30 | -0.85295 | 1.99973  | 6.83020  | 0.02301 | 8.85295  |
| O  | 31 | -0.85307 | 1.99973  | 6.82958  | 0.02375 | 8.85307  |
| O  | 32 | -0.85295 | 1.99973  | 6.83020  | 0.02301 | 8.85295  |
| O  | 33 | -0.91346 | 1.99971  | 6.88560  | 0.02815 | 8.91346  |
| Zn | 34 | 1.70598  | 17.99763 | 10.23702 | 0.05937 | 28.29402 |
| O  | 35 | -0.91346 | 1.99971  | 6.88560  | 0.02815 | 8.91346  |
| O  | 36 | -0.91346 | 1.99971  | 6.88560  | 0.02815 | 8.91346  |

#### Natural Electron Configuration

|    |   |                                                     |
|----|---|-----------------------------------------------------|
| O  | 1 | [core]2S( 1.93)2p( 5.82)3p( 0.03)4p( 0.01)          |
| O  | 2 | [core]2S( 1.71)2p( 5.17)3S( 0.01)3p( 0.01)3d( 0.01) |
| O  | 3 | [core]2S( 1.71)2p( 5.10)3p( 0.01)3d( 0.01)          |
| Zn | 4 | [core]4S( 0.32)3d( 9.91)4p( 0.02)5p( 0.03)          |
| Zn | 5 | [core]4S( 0.31)3d( 9.89)4p( 0.04)5p( 0.02)          |

|    |    |                                                     |
|----|----|-----------------------------------------------------|
| Zn | 6  | [core]4S( 0.27)3d( 9.93)4p( 0.04)5p( 0.01)          |
| Zn | 7  | [core]4S( 0.27)3d( 9.93)4p( 0.04)5p( 0.01)          |
| O  | 8  | [core]2S( 1.71)2p( 5.17)3S( 0.01)3p( 0.01)3d( 0.01) |
| O  | 9  | [core]2S( 1.71)2p( 5.17)3S( 0.01)3p( 0.01)3d( 0.01) |
| O  | 10 | [core]2S( 1.93)2p( 5.82)3p( 0.03)4p( 0.01)          |
| O  | 11 | [core]2S( 1.93)2p( 5.82)3p( 0.03)4p( 0.01)          |
| O  | 12 | [core]2S( 1.72)2p( 5.11)3p( 0.01)3d( 0.01)          |
| O  | 13 | [core]2S( 1.72)2p( 5.11)3p( 0.01)3d( 0.01)          |
| O  | 14 | [core]2S( 1.71)2p( 5.10)3p( 0.01)3d( 0.01)          |
| O  | 15 | [core]2S( 1.72)2p( 5.11)3p( 0.01)3d( 0.01)          |
| O  | 16 | [core]2S( 1.72)2p( 5.11)3p( 0.01)3d( 0.01)          |
| Zn | 17 | [core]4S( 0.27)3d( 9.93)4p( 0.03)5p( 0.02)          |
| Zn | 18 | [core]4S( 0.27)3d( 9.93)4p( 0.04)5p( 0.02)          |
| Zn | 19 | [core]4S( 0.27)3d( 9.93)4p( 0.04)5p( 0.02)          |
| Zn | 20 | [core]4S( 0.27)3d( 9.93)4p( 0.03)5p( 0.02)          |
| O  | 21 | [core]2S( 1.71)2p( 5.10)3p( 0.01)3d( 0.01)          |
| O  | 22 | [core]2S( 1.71)2p( 5.10)3p( 0.01)3d( 0.01)          |
| O  | 23 | [core]2S( 1.71)2p( 5.10)3p( 0.01)3d( 0.01)          |
| O  | 24 | [core]2S( 1.72)2p( 5.11)3p( 0.01)3d( 0.01)          |
| O  | 25 | [core]2S( 1.72)2p( 5.11)3p( 0.01)3d( 0.01)          |
| O  | 26 | [core]2S( 1.72)2p( 5.11)3p( 0.01)3d( 0.01)          |
| O  | 27 | [core]2S( 1.72)2p( 5.11)3p( 0.01)3d( 0.01)          |
| O  | 28 | [core]2S( 1.71)2p( 5.10)3p( 0.01)3d( 0.01)          |
| O  | 29 | [core]2S( 1.72)2p( 5.11)3p( 0.01)3d( 0.01)          |
| O  | 30 | [core]2S( 1.72)2p( 5.11)3p( 0.01)3d( 0.01)          |
| O  | 31 | [core]2S( 1.72)2p( 5.11)3p( 0.01)3d( 0.01)          |
| O  | 32 | [core]2S( 1.72)2p( 5.11)3p( 0.01)3d( 0.01)          |
| O  | 33 | [core]2S( 1.71)2p( 5.17)3S( 0.01)3p( 0.01)3d( 0.01) |
| Zn | 34 | [core]4S( 0.32)3d( 9.91)4p( 0.02)5p( 0.03)          |
| O  | 35 | [core]2S( 1.71)2p( 5.17)3S( 0.01)3p( 0.01)3d( 0.01) |
| O  | 36 | [core]2S( 1.71)2p( 5.17)3S( 0.01)3p( 0.01)3d( 0.01) |

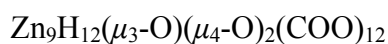

|    |    |          |          |          |         |          |
|----|----|----------|----------|----------|---------|----------|
| O  | 1  | -1.83001 | 1.99998  | 7.78003  | 0.05000 | 9.83001  |
| O  | 2  | -0.87372 | 1.99973  | 6.84994  | 0.02405 | 8.87372  |
| O  | 3  | -0.85444 | 1.99973  | 6.82956  | 0.02516 | 8.85444  |
| Zn | 4  | 1.75314  | 17.99807 | 10.19848 | 0.05031 | 28.24686 |
| Zn | 5  | 1.80552  | 17.99847 | 10.15923 | 0.03678 | 28.19448 |
| Zn | 6  | 1.74079  | 17.99810 | 10.20676 | 0.05435 | 28.25921 |
| Zn | 7  | 1.76228  | 17.99799 | 10.19326 | 0.04647 | 28.23772 |
| O  | 8  | -0.96514 | 1.99974  | 6.92366  | 0.04174 | 8.96514  |
| O  | 9  | -0.83041 | 1.99974  | 6.80053  | 0.03015 | 8.83041  |
| O  | 10 | -1.78967 | 1.99998  | 7.75863  | 0.03107 | 9.78967  |

|    |    |          |          |          |         |          |
|----|----|----------|----------|----------|---------|----------|
| O  | 11 | -1.83393 | 1.99998  | 7.78132  | 0.05262 | 9.83393  |
| O  | 12 | -0.85386 | 1.99973  | 6.83025  | 0.02388 | 8.85386  |
| O  | 13 | -0.85635 | 1.99974  | 6.83380  | 0.02281 | 8.85635  |
| O  | 14 | -0.96232 | 1.99974  | 6.92402  | 0.03856 | 8.96232  |
| O  | 15 | -0.85635 | 1.99973  | 6.83110  | 0.02552 | 8.85635  |
| O  | 16 | -0.86220 | 1.99975  | 6.83887  | 0.02358 | 8.86220  |
| Zn | 17 | 1.74681  | 17.99833 | 10.20193 | 0.05293 | 28.25319 |
| Zn | 18 | 1.74220  | 17.99836 | 10.20460 | 0.05485 | 28.25780 |
| Zn | 19 | 1.74333  | 17.99810 | 10.20771 | 0.05085 | 28.25667 |
| Zn | 20 | 1.76181  | 17.99800 | 10.19422 | 0.04597 | 28.23819 |
| O  | 21 | -0.80041 | 1.99972  | 6.76942  | 0.03127 | 8.80041  |
| O  | 22 | -0.94528 | 1.99974  | 6.90741  | 0.03813 | 8.94528  |
| O  | 23 | -0.81700 | 1.99972  | 6.78534  | 0.03194 | 8.81700  |
| O  | 24 | -0.85300 | 1.99973  | 6.82989  | 0.02338 | 8.85300  |
| O  | 25 | -0.85263 | 1.99973  | 6.82900  | 0.02391 | 8.85263  |
| O  | 26 | -0.86520 | 1.99974  | 6.84105  | 0.02442 | 8.86520  |
| O  | 27 | -0.85829 | 1.99973  | 6.83570  | 0.02286 | 8.85829  |
| O  | 28 | -0.84849 | 1.99973  | 6.82540  | 0.02336 | 8.84849  |
| O  | 29 | -0.85406 | 1.99973  | 6.83015  | 0.02418 | 8.85406  |
| O  | 30 | -0.85920 | 1.99974  | 6.83624  | 0.02322 | 8.85920  |
| O  | 31 | -0.85142 | 1.99973  | 6.82594  | 0.02575 | 8.85142  |
| O  | 32 | -0.86336 | 1.99975  | 6.83993  | 0.02368 | 8.86336  |
| O  | 33 | -0.81826 | 1.99973  | 6.78806  | 0.03047 | 8.81826  |
| Zn | 34 | 1.75544  | 17.99808 | 10.19466 | 0.05182 | 28.24456 |
| O  | 35 | -0.87142 | 1.99973  | 6.84774  | 0.02394 | 8.87142  |
| O  | 36 | -0.92787 | 1.99973  | 6.88997  | 0.03818 | 8.92787  |

#### Natural Electron Configuration

|    |    |                                                     |
|----|----|-----------------------------------------------------|
| O  | 1  | [core]2S( 1.93)2p( 5.85)3p( 0.04)4p( 0.01)          |
| O  | 2  | [core]2S( 1.72)2p( 5.13)3p( 0.01)3d( 0.01)          |
| O  | 3  | [core]2S( 1.72)2p( 5.11)3p( 0.01)3d( 0.01)          |
| Zn | 4  | [core]4S( 0.27)3d( 9.93)4p( 0.02)5p( 0.03)          |
| Zn | 5  | [core]4S( 0.24)3d( 9.92)4p( 0.02)5S( 0.01)          |
| Zn | 6  | [core]4S( 0.28)3d( 9.93)4p( 0.03)5p( 0.02)          |
| Zn | 7  | [core]4S( 0.26)3d( 9.94)4p( 0.02)5p( 0.02)          |
| O  | 8  | [core]2S( 1.73)2p( 5.20)3S( 0.01)3p( 0.03)3d( 0.01) |
| O  | 9  | [core]2S( 1.72)2p( 5.08)3p( 0.01)3d( 0.01)          |
| O  | 10 | [core]2S( 1.93)2p( 5.83)3p( 0.02)                   |
| O  | 11 | [core]2S( 1.93)2p( 5.85)3p( 0.04)4p( 0.01)          |
| O  | 12 | [core]2S( 1.72)2p( 5.11)3p( 0.01)3d( 0.01)          |
| O  | 13 | [core]2S( 1.72)2p( 5.11)3p( 0.01)3d( 0.01)          |
| O  | 14 | [core]2S( 1.72)2p( 5.21)3S( 0.01)3p( 0.02)3d( 0.01) |
| O  | 15 | [core]2S( 1.72)2p( 5.11)3p( 0.01)3d( 0.01)          |

|    |    |                                                     |
|----|----|-----------------------------------------------------|
| O  | 16 | [core]2S( 1.72)2p( 5.12)3p( 0.01)3d( 0.01)          |
| Zn | 17 | [core]4S( 0.27)3d( 9.93)4p( 0.02)5p( 0.03)          |
| Zn | 18 | [core]4S( 0.27)3d( 9.93)4p( 0.05)                   |
| Zn | 19 | [core]4S( 0.28)3d( 9.93)4p( 0.04)                   |
| Zn | 20 | [core]4S( 0.26)3d( 9.94)4p( 0.02)5p( 0.02)          |
| O  | 21 | [core]2S( 1.71)2p( 5.05)3p( 0.01)3d( 0.01)          |
| O  | 22 | [core]2S( 1.72)2p( 5.19)3S( 0.01)3p( 0.02)3d( 0.01) |
| O  | 23 | [core]2S( 1.72)2p( 5.07)3p( 0.01)3d( 0.01)4p( 0.01) |
| O  | 24 | [core]2S( 1.72)2p( 5.11)3p( 0.01)3d( 0.01)          |
| O  | 25 | [core]2S( 1.72)2p( 5.11)3p( 0.01)3d( 0.01)          |
| O  | 26 | [core]2S( 1.72)2p( 5.12)3p( 0.01)3d( 0.01)          |
| O  | 27 | [core]2S( 1.72)2p( 5.11)3p( 0.01)3d( 0.01)4p( 0.01) |
| O  | 28 | [core]2S( 1.72)2p( 5.11)3p( 0.01)3d( 0.01)          |
| O  | 29 | [core]2S( 1.72)2p( 5.11)3p( 0.01)3d( 0.01)          |
| O  | 30 | [core]2S( 1.72)2p( 5.11)3p( 0.01)3d( 0.01)          |
| O  | 31 | [core]2S( 1.72)2p( 5.11)3p( 0.01)3d( 0.01)          |
| O  | 32 | [core]2S( 1.72)2p( 5.12)3p( 0.01)3d( 0.01)          |
| O  | 33 | [core]2S( 1.72)2p( 5.07)3p( 0.01)3d( 0.01)          |
| Zn | 34 | [core]4S( 0.26)3d( 9.93)4p( 0.03)5p( 0.02)          |
| O  | 35 | [core]2S( 1.72)2p( 5.13)3p( 0.01)3d( 0.01)          |
| O  | 36 | [core]2S( 1.72)2p( 5.17)3S( 0.01)3p( 0.02)3d( 0.01) |

---

### References

- [S3] E. D. Glendening, A. E. Reed, J. E. Carpenter and F. Weinhold, *NBO Version 3.1*.
- [S4] M. J. Frisch, G. W. Trucks, H. B. Schlegel, G. E. Scuseria, M. A. Robb, J. R. Cheeseman, J. A. Montgomery, Jr., T. Vreven, K. N. Kudin, J. C. Burant, J. M. Millam, S. S. Iyengar, J. Tomasi, V. Barone, B. Mennucci, M. Cossi, G. Scalmani, N. Rega, G. A. Petersson, H. Nakatsuji, M. Hada, M. Ehara, K. Toyota, R. Fukuda, J. Hasegawa, M. Ishida, T. Nakajima, Y. Honda, O. Kitao, H. Nakai, M. Klene, X. Li, J. E. Knox, H. P. Hratchian, J. B. Cross, V. Bakken, C. Adamo, J. Jaramillo, R. Gomperts, R. E. Stratmann, O. Yazyev, A. J. Austin, R. Cammi, C. Pomelli, J. W. Ochterski, P. Y. Ayala, K. Morokuma, G. A. Voth, P. Salvador, J. J. Dannenberg, V. G. Zakrzewski, S. Dapprich, A. D. Daniels, M. C. Strain, O. Farkas, D. K. Malick, A. D. Rabuck, K. Raghavachari, J. B. Foresman, J. V. Ortiz, Q. Cui, A. G. Baboul, S. Clifford, J. Cioslowski, B. B. Stefanov, G. Liu, A. Liashenko, P. Piskorz, I. Komaromi, R. L. Martin, D. J. Fox, T. Keith, M. A. Al-Laham, C. Y. Peng, A. Nanayakkara, M. Challacombe, P. M. W. Gill, B. Johnson, W. Chen, M. W. Wong,

C. Gonzalez and J. A. Pople, *GAUSSIAN 03 (Revision D.02)*, Gaussian, Inc., Wallingford CT, 2004.

[S5] (a) D. Samanta and P. Jena, *J. Am. Chem. Soc.*, 2012, **134**, 8400; (b) S. S. Hepperle and Y. A. Wang, *J. Phys. Chem. A*, 2013, **117**, 4657; (c) D. P. Martin, P. G. Blachly, A. R. Marts, T. M. Woodruff, C. A. F. de Oliveira, J. A. McCammon, D. L. Tierney and S. M. Cohen, *J. Am. Chem. Soc.*, 2014, **136**, 5400.

**4. CD, PXRD, TGA and luminescent and the photoluminescence lifetime patterns**

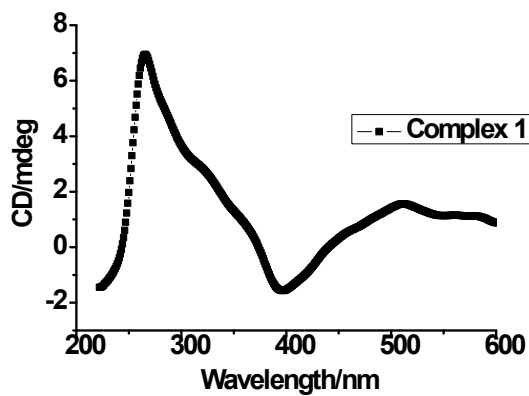

**Figure S1.** Solid-state circular dichroism spectrum of **1**

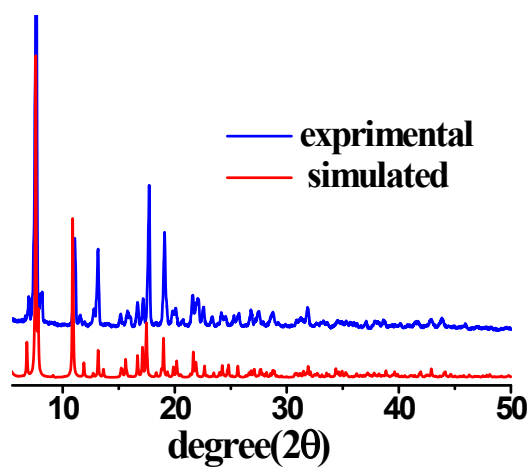

**Figure S2.** Powder X-ray diffraction pattern of **1**

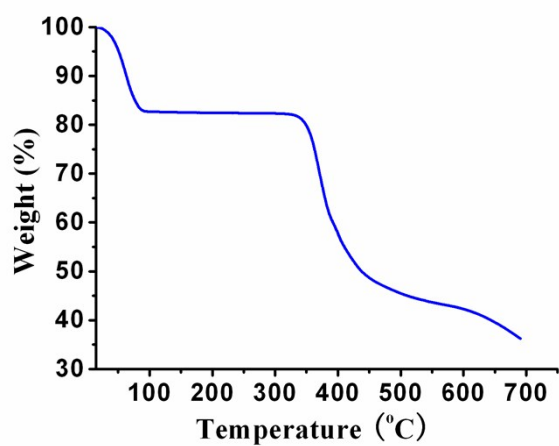

**Figure S3.** The TGA pattern of complex **1**

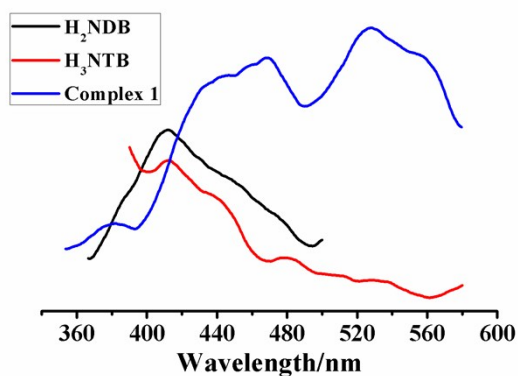

**Figure S4.** The solid photoluminescent patterns of complex **1**, H<sub>3</sub>NTB and H<sub>2</sub>NDB

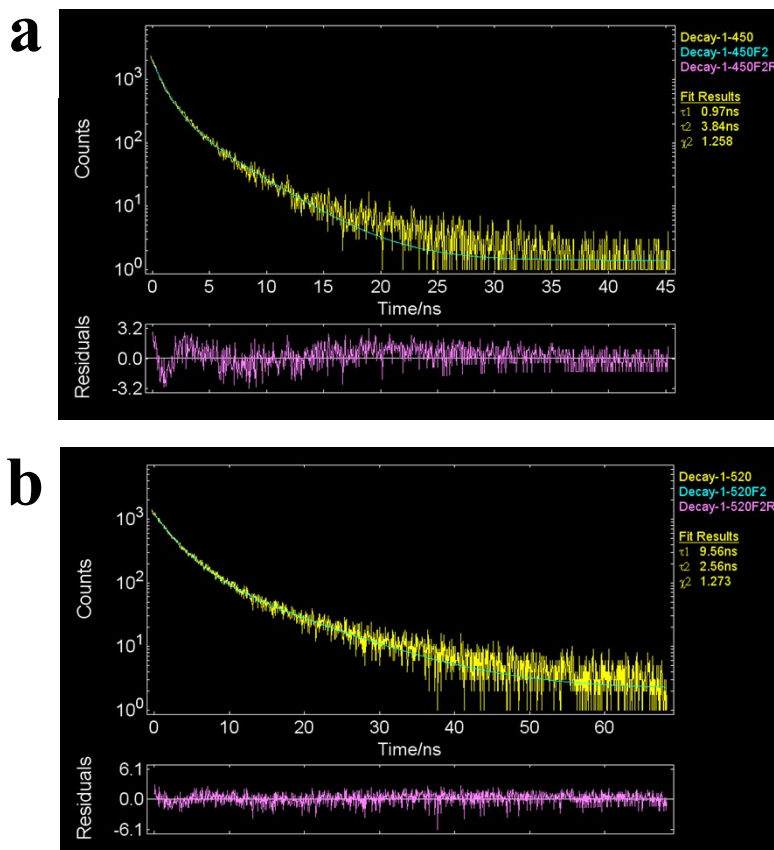

**Figure S5.** The fitted decay curve monitored at 450nm **(a)** and 520 nm **(b)** for complex **1** in the solid state at room temperature. The sample is excited at 370 nm. Yellow lines: experimental data; Solid line: fitted by  $\text{Fit} = A + B_1 \times \exp(-t/\tau_1) + B_2 \times \exp(-t/\tau_2)$ .

## 5. Bond lengths (Å) and angles (deg) of complex 1

**Table S1.** Selected Bond Lengths (Å) and Angles (deg) for Complex 1

| Complex 1   |            |             |            |
|-------------|------------|-------------|------------|
| O1-Zn2      | 1.740(5)   | O1-Zn3      | 1.891(4)   |
| O2-Zn1      | 1.949(4)   | O3-Zn3      | 1.922(5)   |
| O4-Zn3      | 1.914(4)   | O5-Zn3      | 1.973(4)   |
| O6-Zn4      | 1.909(4)   | O7-Zn4      | 1.880(4)   |
| O8-Zn4      | 1.944(4)   | O9-Zn5      | 1.956(4)   |
| O10-Zn5     | 1.884(6)   | O10-Zn4     | 1.960(2)   |
| O2-Zn1-O2   | 99.43(16)  | O1-Zn2-O1   | 120.0      |
| O1-Zn3#1-O4 | 99.02(13)  | O1-Zn3#1-O3 | 142.45(17) |
| O4-Zn3#1O3  | 105.88(17) | O1-Zn3#1-O5 | 92.70(12)  |
| O4-Zn3#1-O5 | 116.30(16) | O3-Zn3#1-O5 | 100.67(16) |
| O7-Zn4-O6   | 118.56(16) | O7-Zn4-O8   | 102.98(18) |
| O6-Zn4-O8   | 103.78(17) | O7-Zn4-O10  | 110.84(14) |
| O6-Zn4-O10  | 113.25(13) | O8-Zn4-O10  | 105.8(2)   |
| O10-Zn5-O9  | 109.54(12) | O9-Zn5-O9   | 109.40(12) |

#1 =  $1-x$ ,  $1-x+y$ ,  $-z$ .
